# Supplementary material for: Loss of Tumor Suppressor CYLD Expression Triggers Cisplatin Resistance in Oral Squamous Cell Carcinoma
Source: MDPI journal article supplement (doi:10.3390/ijms20205194), 2019-10-20
Supplement: s1 [file s1]

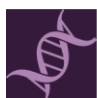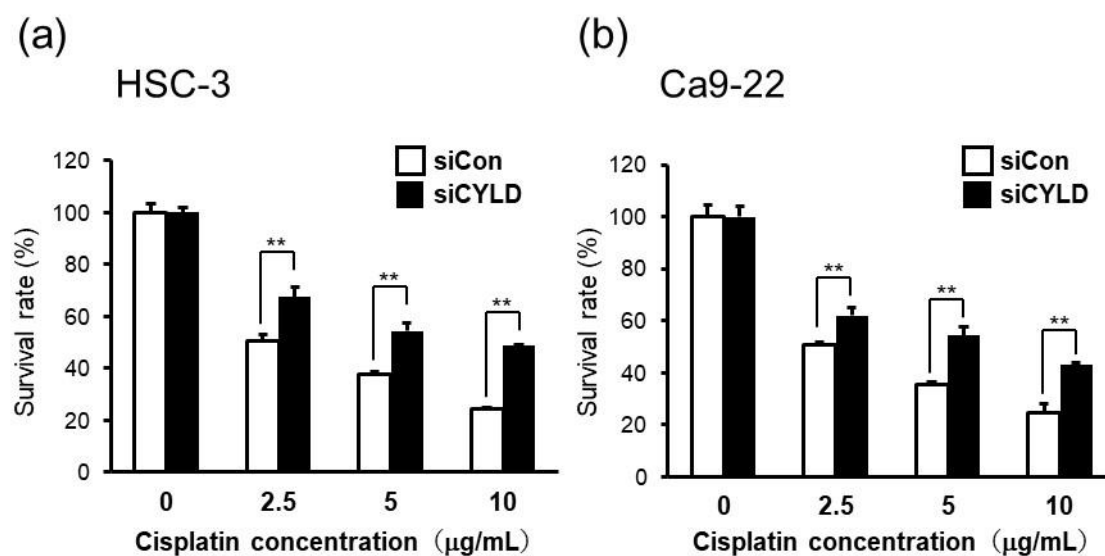

**Supplemental Figure 1.** Effect of CYLD down-regulation on cisplatin sensitivity in various types of OSCC cell lines. (a) HSC-3 cells and (b) Ca9-22 cells were transfected with control siRNA (siCon) or CYLD-specific siRNA (siCYLD) and then treated with cisplatin. The cell survival rates of those cells after cisplatin treatment (0 ~ 10 μg/mL) were assessed. Values are means ± SD of triplicate samples. \*\* $p < 0.01$  vs siCon group.
